## **GardeninA confers neuroprotection against environmental toxin in a *Drosophila* model of Parkinson's disease**

Urmila Maitra<sup>1\*</sup>, Thomas Harding<sup>1</sup>, Qiaoli Liang<sup>2</sup>, Lukasz Ciesla<sup>1\*</sup>

<sup>1</sup>Department of Biological Sciences, University of Alabama, 2320 Science and Engineering Complex, Tuscaloosa, Alabama 35487-0344; <sup>2</sup>Mass Spectrometry Facility, Department of Chemistry and Biochemistry, University of Alabama, 2004 Shelby Hall, Tuscaloosa, Alabama 35487-0336

\*Co-corresponding authors: Dr. Urmila Maitra and Dr. Lukasz Ciesla

Department of Biological Sciences,  
University of Alabama,  
2320 Science and Engineering Complex,  
Tuscaloosa, Alabama 35487-0344  
Email: [umaitra@ua.edu](mailto:umaitra@ua.edu) ; [lmciesla@ua.edu](mailto:lmciesla@ua.edu)  
Tel: 205-348-1828

## Abstract

Parkinson's disease (PD) is an age-associated neurodegenerative disorder characterized by the progressive loss of dopaminergic neurons from the midbrain. Epidemiological studies have implicated exposures to environmental toxins like the herbicide, paraquat (PQ) as major contributors to PD etiology in both mammalian and invertebrate models. We have employed a PQ-induced PD model in *Drosophila* as an inexpensive *in vivo* platform to screen therapeutics from natural products. We have identified the polymethoxyflavonoid, GardeninA, with neuroprotective potential against PQ-induced parkinsonian symptoms involving reduced survival, mobility defects, and loss of dopaminergic neurons. GardeninA-mediated neuroprotection is not solely dependent on its antioxidant activities but also involves modulation of the neuroinflammatory and cellular death responses. Furthermore, we have successfully detected GardeninA bioavailability in the fly heads after oral administration using ultra-performance liquid chromatography and mass spectrometry. Our findings reveal a molecular mechanistic insight into GardeninA-mediated neuroprotection against environmental toxin-induced PD pathogenesis for novel therapeutic intervention.

## Introduction

Neurodegenerative disorders, including Parkinson's (PD) and Alzheimer's disease (AD) have emerged as one of the greatest medical challenges of the 21<sup>st</sup> century<sup>1,2</sup>. PD is the second most common age-associated neurodegenerative movement disorder primarily characterized by the progressive loss of dopaminergic neurons from the midbrain<sup>3</sup>. Neurodegenerative diseases (NDs) cost the U.S. economy billions of dollars each year in direct health care costs, and the costs to the society will further increase. Unfortunately, the pathogenesis of idiopathic PD is not well understood, and current therapies only provide symptomatic relief but fail to slow down or prevent disease progression. A dire need exists to develop novel therapies targeting early molecular pathways involved in the development and progression of PD.

In addition to genetic mutations, numerous epidemiological studies have strongly indicated that occupational exposure to environmental toxins, such as pesticides like paraquat (PQ), rotenone, or neurotoxic metals, is associated with a higher risk of developing idiopathic PD<sup>4,5</sup>. Exposure to PQ is known to induce oxidative stress and mimic clinical signs similar to PD, including reduced motor function and selective dopamine neuron degeneration, which can be rescued by administration of L-dopa in both mammalian and *Drosophila* models<sup>6,7</sup>. A recent study has demonstrated the link between PQ exposure and PD using human stem cells<sup>8</sup>. Moreover, our recently published data using transcriptomic analysis identified genes in *Drosophila* PD model, whose mammalian orthologs are implicated in PD pathogenesis<sup>6</sup>. PQ has also been shown to induce dysregulated inflammatory responses related to neuronal cell death<sup>6</sup>. Both oxidative stress and neuroinflammation have been associated with PD pathogenesis in both mammalian and *Drosophila* models<sup>9</sup>. These similarities strongly underscore the utilization of the *Drosophila* PD model as an *in vivo* screening platform to identify novel plant-derived therapeutics due to the

presence of evolutionarily conserved mechanistic pathways that are associated with the disease pathogenesis.

Numerous epidemiologic studies have shown a plant-based diet, especially rich in flavonoids is associated with lower mortality and decreased risk of developing age-associated chronic diseases<sup>10-12</sup>. Plants produce specialized metabolites, which provide protection from environmental stressors both in plants and animals feeding on them<sup>12</sup>. However, the exact neuroprotective mechanism of these phytochemicals is not clear. For many years, it has been promulgated that most of these molecules work as free radical scavengers, preventing DNA damage, especially in the mitochondria by direct antioxidant activity<sup>12,13</sup>. Rigorous experiments involving human clinical trials disproved this theory<sup>12</sup>. However, the antioxidant theory is very much alive in our society, a belief that fuels \$3 billion global industry selling pills and drinks with “natural antioxidants”<sup>14</sup>. The emerging evidence suggests that phytochemicals may exert disease-preventive and therapeutic actions by interacting with certain evolutionarily conserved cellular response pathways, as suggested by neurohormesis and xenohormesis hypotheses<sup>13,15</sup>.

Plant-derived molecules have a long history of use as templates for the development of novel medicines for numerous diseases, including NDs<sup>16</sup>. Levodopa (L-dopa), currently the most commonly prescribed drug for PD, was first identified from the broad bean (*Vicia faba*)<sup>17</sup>. *Mucuna pruriens* has been considered as a possible alternative in the management of PD in patients who cannot afford L-dopa therapy<sup>18</sup>. Molecules of dopamine receptor agonists also used in PD therapy, pergolide and lisuride are synthetic derivatives of ergoline, a natural alkaloid first described in ergot<sup>19</sup>. Several natural compounds produced by plants and microbes have been recently found to extend lifespan and provide neuroprotective effects, for example, rapamycin, fisetin, curcumin, and its derivatives, quercetin and its derivatives, 7,8-dihydroxyflavone<sup>20-24</sup>. Recently, Zhang *et al.*

showed that a combination of the chemotherapeutic drug, dasatinib, and a natural flavonoid, quercetin, alleviates A $\beta$ -associated senescence and improves cognitive deficits in a mice model of AD<sup>25</sup>. There have also been several published examples of other compounds that are protective against toxin-induced neurodegeneration, for example, metformin<sup>26</sup>, catalpol<sup>27</sup> or echinacoside<sup>28</sup>. However, most studies concentrate on the antioxidant theory and lack in-depth molecular mechanisms of action underlying the neuroprotective phenotypes. Additionally, several studies carried out to date focus on evaluating the neuroprotective effects in cell culture models using super-physiological concentrations of phytochemicals, which mostly translate to poor clinical outcomes<sup>29</sup>. Another concern regarding the use of natural products, especially flavonoids as therapeutics is their poor bioavailability<sup>30</sup>. There is a need to evaluate the neuroprotective effects of natural products at pharmacologically relevant concentrations in the context of a living organism.

Here, we have employed a well-established PQ-induced PD model in *Drosophila* as an *in vivo* screening platform to identify neuroprotective natural compounds. Plants produce various molecules, many of which interact with evolutionarily conserved pathways, as these compounds evolved either in common ancestor or in response to insect herbivory. This makes the *Drosophila* PD model an appropriate and inexpensive screening platform during the initial stages of the drug discovery pipeline before validations in mammalian models. We have identified a flavonoid, GardeninA, whose neuroprotective mechanism against PQ-induced PD symptoms is not solely dependent on its antioxidant activities. GardeninA-mediated protection involves modulation of multiple pathways, including the neuroinflammatory and cellular death responses that are intricately associated with PD pathogenesis. Furthermore, this is the first report showing the bioavailability of the neuroprotective flavonoid, GardeninA in *Drosophila* heads at

pharmacologically relevant nanomolar doses using ultra-performance liquid chromatography and mass spectrometry (UPLC-QTOF-MS).

## Results

### **The flavonoid GardeninA confers protection against paraquat-induced toxicity and mobility defects.**

We have previously shown that exposure to the herbicide, paraquat (PQ) significantly reduces survival and impairs climbing abilities in the wild-type *Drosophila* strain, *Canton S*<sup>6,31</sup>. We employed an environmental toxin-induced model in *Drosophila*, that recapitulates the behavioral and pathological symptoms of PD, as a screening platform to identify phytochemicals with therapeutic potential against PQ toxicity using the feeding regimen shown in Fig. 1a. We have only used adult male flies due to their higher sensitivity to PQ toxicity leading to neurodegenerative PD phenotypes at an earlier stage than female flies, consistent with a higher prevalence of PD in human male patients<sup>31</sup>. Adult male flies (10 males/vial; biological replicates from 10 independent vials) were pre-fed for 4 days with either 2.5% sucrose solution as control or GardeninA (GA) 10  $\mu$ M diluted in 2.5% sucrose solution on filter paper through ingestion, followed by exposure to 5 mM PQ continuously to induce parkinsonian symptoms until all of the flies were dead. Survival was scored every 24 h post-exposure and the survival percentages on days 1, 3, and 5 post PQ exposure between different feeding groups were plotted in Fig. 1b. The data show that PQ exposure leads to a gradual increase in mortality of flies with average survival of 70% and 30% on days 3 and 5, respectively. Interestingly, GA pre-treatment provided significant protection against PQ-induced toxicity with 60% survival of flies on day 5 as compared to 30% of sucrose-fed control flies ( $p < 0.01$ ). We screened different concentrations of GA (5, 10, 20, and 40  $\mu$ M) and selected 10  $\mu$ M for further studies that yielded the maximal rescue effect

against PQ toxicity in the survival assays. Next, we examined whether GA was able to restore mobility defects induced by PQ using negative geotaxis assay. The flies were pre-fed for 4 days with either sucrose or 10  $\mu$ M GA followed by continuous exposure to PQ and climbing assessment was performed at 24 and 48 h time points post-exposure. As shown in Fig. 1c, PQ exposure significantly reduced climbing abilities, whereas GA pre-treatment significantly restored PQ-induced mobility impairment to 75% as compared to 45% of the control sucrose-fed group ( $p < 0.001$ ) at 48 h post-exposure to PQ. Consistent with earlier findings, co-feeding levodopa (L-dopa) 0.5 mM, a dopamine replacement drug used as a gold standard in PD also significantly increased survival percentages of flies to 70% after exposure to PQ ( $p < 0.01$ ), thereby mirroring the therapeutic effects observed in human PD patients (Fig. 1d). Furthermore, L-dopa treatment improved mobility defects in flies exposed to PQ (Fig. 1e), thereby underscoring the suitability of this environmental toxin-induced model as a screening platform to identify plant derived therapeutics against PD pathogenesis. Overall, GA appears to be a potential neuroprotective candidate against PQ toxicity in *Drosophila*.

### **Effect of structurally related Gardenin B on paraquat-induced toxicity and mobility defects.**

Our next goal was to determine the effect of Gardenin B (GB), another flavonoid structurally related to GA, on PQ-mediated toxicity using survival assays. GB contains fewer methoxy groups in the B ring of the flavone skeleton as compared to GA (Fig. 2a). We used the same feeding regimen as depicted in Fig. 1a, where adult male flies were pre-fed for 4 days with either sucrose or 10  $\mu$ M GB diluted in 2.5% sucrose solution, and then continuously exposed to 5 mM PQ and survival was scored every 24 h. The survival percentages were plotted for days 1, 3, and 5 post-PQ exposure. Surprisingly, GB pretreatment was not effective in conferring protection against

PQ-induced toxicity in survival assays (Fig. 2b). Next, we determined the effect of GB on PQ-induced mobility defects using negative geotaxis assay. The flies were pre-fed for 4 days with either sucrose or 10  $\mu$ M GB and then exposed to PQ and climbing assessment was performed at 24 and 48 h time points. As shown in Fig. 2c, PQ exposure significantly reduced climbing abilities and GB pre-treatment failed to rescue PQ-induced mobility impairment as compared to the control sucrose-fed group. Our data confirm that the structurally related polymethoxyflavonoid, GB is not protective against PQ-induced toxicity and mobility defects.

### **Gardenin A but not Gardenin B rescues against paraquat-mediated loss of dopaminergic neurons.**

Paraquat has been shown to induce the loss of specific clusters of dopaminergic neurons in both mammalian and *Drosophila* PD models<sup>6,31</sup>. Since GA pretreatment improved PQ-induced mobility defects, we analyzed the effect of GA and GB on specific clusters of dopaminergic (DA) neurons in the adult *Drosophila* brain. We monitored the DA clusters using GFP expression driven by the tyrosine hydroxylase (TH)-promoter in *TH-Gal4; UAS-GFP* transgenic adults. Consistent with earlier findings, the numbers of DA neurons in the protocerebral posterior median (PPM) and protocerebral posterior lateral (PPL1) clusters in the posterior region of the brain were significantly lower in the PQ-fed group (PPM: 4.67; PPL1: 7) as compared to the control sucrose-fed flies (PPM: 8; PPL1: 11;  $p < 0.01$ ) (Fig. 3a and b). However, pretreatment with GA resulted in the rescue of specific clusters of DA neurons (PPM: 6.5; PPL1: 9.33;  $p < 0.01$ ) that were more susceptible to PQ exposure ( $p < 0.01$ ). The lower panel highlights the enlarged version of the PPM DA clusters for different feeding conditions (Fig. 3a). Interestingly, the structurally related flavonoid, GB pretreatment failed to improve DA neuron degeneration in response to PQ (PPM: 4; PPL1: 5.67;



$p > 0.05$ ) (Fig. 3a and b). These results suggest that GA but not GB is protective against PQ-induced neurotoxicity involving DA neuron loss.

**The antioxidant activity is not sufficient to confer neuroprotection against paraquat-induced oxidative stress.**

Previous studies have underscored the role of oxidative stress in the onset and progression of NDs, including AD and PD<sup>32</sup>. The herbicide PQ is known to induce oxidative stress leading to the clinical signs of PD in both mammalian and invertebrate models. Most of the reported studies on flavonoids claim that they provide neuroprotection by scavenging free radicals like reactive oxygen species and inducing the antioxidant response within the cells to suppress oxidative stress<sup>33</sup>. Therefore, to evaluate the effects of GA and GB on PQ-induced oxidative stress, the flies were pre-fed with either sucrose or GA or GB for 4 days followed by PQ exposure for 18 h as it gave reproducible data between independent biological replicates at this time point. Lipid peroxidation assay was used to assess the levels of oxidative stress as a measure of malondialdehyde (MDA), one of the final products of polyunsaturated fatty acids peroxidation in the cells. As shown in Fig. 4a, PQ significantly induced oxidative stress by increasing the MDA levels ( $0.39 \mu\text{M}$ ) relative to the sucrose-fed control flies ( $0.19 \mu\text{M}$ ;  $p < 0.001$ ). Interestingly, both GA and GB pre-treatment significantly decreased the levels of MDA to  $0.22 \mu\text{M}$  and  $0.25 \mu\text{M}$ , respectively, and thereby reducing PQ-induced oxidative stress.

Another way of controlling oxidative stress involves the nuclear factor erythroid 2-related factor 2 (Nrf2), which acts as a regulator of cellular resistance to oxidants. Nrf2 is known to regulate the expression of a wide array of antioxidant genes and detoxifying proteins such as thioredoxins, glutathione synthetase, and glutathione S-transferases<sup>34</sup>. Recent studies have shown that activation

of Nrf2 is protective against genetic and environmental toxin induced neurodegenerative phenotypes, thereby highlighting its neuroprotective potential in both mammalian and invertebrate PD models. Interestingly, Nrf2 homologs are conserved in *Drosophila* and it belongs to the *cap'n'collar (cnc)* subfamily of leucine zippers, named after the *cnc* gene of *Drosophila*. We evaluated the effect of PQ exposure on Nrf2 transcript levels by qRT-PCR and confirmed the induction of Nrf2 mRNA to 2.3-fold compared to the sucrose-fed control group (Fig. 4b). Moreover, both GA and GB pre-treatment resulted in further induction of the Nrf2 transcript levels, thereby supporting its role in activating the antioxidant response to counteract against PQ toxicity. Surprisingly, our data suggests that only GA and not GB is protective against PQ-induced neurotoxicity. Overall, these data confirm that the neuroprotective effects of GA against PQ toxicity are not solely dependent on the antioxidant activities of flavonoids.

### **Gardenin A confers neuroprotection by regulating the neuroinflammatory responses in *Drosophila*.**

In recent years, the role of dysregulated neuroinflammation in PD pathogenesis has garnered increased attention as an effective way to prevent the onset and progression of NDs<sup>35</sup>. We previously found that PQ exposure activates the innate immune transcription factor, Relish, the *Drosophila* orthologue of mammalian NFκB which in turn leads to reduced survival, increased mobility defects and loss of dopaminergic neurons<sup>6</sup>. Therefore, we next determined the effect of GA and GB on the transcript levels of *relish*. As reported earlier, *relish* transcript levels were induced 2.9-fold in response to PQ treatment (Fig. 5a)<sup>6</sup>. Interestingly, pre-treatment with GA reduced the levels of *relish* transcripts to 1.5-fold but GB failed to suppress the PQ-mediated induction of *relish* transcripts (Fig. 5a). This data suggests that GA-mediated protection against PQ toxicity is dependent on the downregulation of the transcription factor, Relish. To further

confirm the involvement of Relish, we performed survival assays in *relish-null* mutant flies that lack the functional Relish protein. We used the same feeding regimen in which the flies (10 males/vial; biological replicates from 10 independent vials) were pre-fed for 4 days with either sucrose as control or 10  $\mu$ M GA diluted in 2.5% sucrose solution, and then exposed to 5 mM PQ and survival was scored every 24 h and plotted for different feeding groups. As shown in Fig. 5b, pre-treatment with GA or GB failed to provide protection against PQ exposure in the absence of Relish, thereby supporting the role of Relish in GA-mediated protection against PQ toxicity.

Previous studies have implicated a role of nitric oxide (NO) in the neuroinflammatory responses in PD pathogenesis<sup>36,37</sup>. In *Drosophila*, NO is produced by hemocytes which are analogous to mammalian macrophages and functions as a critical component of the innate immunity to protect against infection. Interestingly, several studies have shown induction of NO in response to the herbicide, PQ in flies and mammalian PD models<sup>38-40</sup>. Therefore, we investigated the effect of GA and GB pre-treatment on NO levels following PQ exposure. Adult flies were pre-fed for 4 days with either sucrose as control or GA or GB 10  $\mu$ M diluted in 2.5% sucrose solution, and then exposed to 5 mM PQ and NO levels were evaluated in the fly heads using a fluorometric NO assay kit. As shown in Fig. 5c, the nitrite levels were significantly induced by PQ exposure compared to the sucrose-fed control flies ( $p < 0.01$ ). We used NG-nitro-L-arginine methyl ester (L-NAME), a nitric oxide synthase (NOS) inhibitor, as a positive control to determine the specificity of the assay. As expected, L-NAME treatment reduced the levels of PQ-induced NO levels. Although, both GA and GB were able to reduce the NO levels, GA was significantly more effective in inhibiting the NO production mediated by PQ. Next, we determined the effect of GA and GB pre-treatment on the transcript levels of NOS, the enzyme responsible for the generation of NO. As shown in Fig. 5d, the levels of NOS mRNA were significantly induced in response to PQ exposure and GA

pretreatment reduced the levels of NOS compared to GB, thereby mirroring the results of the biochemical assays for NO generation. Collectively, our data confirms that GA elicits neuroprotection against PQ toxicity through the regulation of inflammatory pathways involving Relish and NO.

### **Differential regulation of caspase-dependent cellular death by Gardenin A and Gardenin B.**

Previous studies have indicated the involvement of caspases in inducing the death of DA neurons leading to PD pathogenesis<sup>41,42</sup>. Specifically, the activation of one of the downstream executioner caspases, caspase-3 has been associated with apoptotic cell death resulting in neuronal demise<sup>43</sup>. Moreover, caspase inhibition has been shown to alleviate dopaminergic neuronal death in mammalian PD models. Flavonoids are known to regulate apoptotic pathways in both *in vitro* and *in vivo* disease models, including NDs<sup>44,45</sup>. Therefore, we aimed to determine the effects of GA and GB on the activation of caspase-3 responsible for inducing apoptotic cell death. Adult flies were pre-fed for 4 days with either sucrose as control or GA or GB 10  $\mu$ M diluted in 2.5% sucrose solution, and then exposed to 5 mM PQ followed by detection of caspase-3 activities in the fly heads after 24 h. Consistent with earlier findings, PQ exposure resulted in significant activation of caspase-3 activities when normalized to the sucrose-fed control flies (Fig. 6a). We used a caspase-3 inhibitor, Ac-DEVD-CHO as a positive control to ensure the specificity of the assay. Interestingly, GA pretreatment reduced the levels of PQ-mediated active caspase-3. On the other hand, GB failed to decrease the levels of caspase-3 activity induced in response to PQ exposure. Furthermore, we determined the role of GA and GB in regulating the expression of an upstream pro-apoptotic gene, *reaper*. In *Drosophila*, reaper can induce apoptosis by inactivating the inhibitor of apoptosis proteins (IAP) and thereby rescuing caspases from proteasomal degradation. Using qRT-PCR, we showed that PQ induces the transcript levels of *reaper* and GA pretreatment

resulted in the downregulation of the pro-apoptotic gene, *reaper* (Fig. 6b). Overall, the data confirms that GA suppresses PQ-induced neurodegeneration by inhibiting the activation of pro-apoptotic factors, including *reaper* and Caspase-3 responsible for dopaminergic neuronal death.

### **Quantitation of Gardenin A in the *Drosophila* heads using UPLC/QTOF/MS SIR**

One of the major drawbacks of drug development from natural products is the lack of information regarding the bioavailability of specialized metabolites in both cellular and invertebrate models, including *Drosophila*. We have successfully employed UPLC-QTOF-MS SIR (selected ion recording) to detect the levels of GA in the fly heads after feeding the flies for 4 days with either sucrose or GA 10  $\mu$ M as shown in Fig. 7a. The fly heads were collected using liquid nitrogen and homogenized in dimethyl sulfoxide (DMSO) containing specified amounts (1  $\mu$ M) of a structurally related flavonoid, Nobiletin as the internal standard spiked during the extraction step. The samples were then centrifuged to remove the debris and the supernatant was collected for analysis. The calibration curves were generated using GA standards in the following concentrations ranging from 1 nM to 100 nM containing fixed amount of the internal standard Nobiletin (1  $\mu$ M). The chromatogram profiles in Fig. 7b and c shows the peak of GA and Nobiletin at the retention times of 6.97 min; m/z 419.1342 and 5.52 min; m/z 403.1393, respectively. We employed the peak integration method to calculate the peak area ratios for GA and Nobiletin and detected the average concentration of GA in the fly heads for the GA-fed samples as 7.64  $\pm$  2.1 nM/mg (Fig. 7b). GardeninA is characterized by relatively high lipophilicity (XLogP-AA, 3.2) and strong retention on the chromatographic column, which resulted in traces of this molecule detected in the sucrose-fed samples (Fig. 7c). Based on the standard calibration curve with the peak integration method and linear regression coefficients greater than 0.998, the recovery of the internal standard Nobiletin in the fly head extract was 47  $\pm$  1.45 % (n=3). Although characterized by rather low recovery rate,

the analytical approach allowed for the detection and quantification of the tested molecule at pharmacologically relevant concentration in the *Drosophila* head samples. Although, the proposed approach still needs further improvement and full validation, it served the purpose of detecting the presence of GardeninA in the fly heads after oral administration. The analysis of xenobiotics in *Drosophila* is notoriously difficult and there are no available analytical protocols to study the bioavailability of the tested molecules. To the best of our knowledge, this is the first report showing that the oral administration of flavonoids to the flies in lower micromolar concentrations (10  $\mu$ M) translates to pharmacologically relevant nanomolar dosages *in vivo* in the fly heads.

## Discussion

In this study, we employed an environmental toxin-induced PD model in *Drosophila* as the screening platform to identify neuroprotective natural products. Current PD therapies are only effective in providing temporary symptomatic relief<sup>46</sup>. There is an urgent need for novel advances in PD therapy that can target the underlying pathways associated with the disease onset and progression. Dietary intake of flavonoids which are naturally occurring plant polyphenols has been shown to alleviate the risk of developing several chronic diseases, including NDs<sup>12,46,47</sup>. We identified the polymethoxyflavonoid, GardeninA (GA), with neuroprotective potential against PQ-induced parkinsonian symptoms along with underlying mechanism of action for improved therapeutic intervention.

Our data show that pretreatment with the flavonoid, GA, significantly improves survival, mobility defects, and dopaminergic neuron loss against PQ-induced neurotoxicity in *Drosophila*. Another group reported the involvement of GA in promoting neuritogenesis in PC12 cells and neurite alterations have been observed in PD patients<sup>29,48</sup>. A recent study revealed significant antidepressant actions of GA, thereby suggesting neuropharmacological effects in mice<sup>49</sup>. However, this is the first study to reveal the neuroprotective potential of GA against environmental toxin-induced neurodegenerative phenotypes in *Drosophila*. On the other hand, the structurally related GardeninB (GB) failed to protect against PQ-induced neurotoxicity, which could potentially be attributed to the lower number of methoxy groups attached to the parent flavone skeleton. Interestingly, methoxylation of flavones has been shown to enhance their anti-inflammatory activities<sup>50</sup>. PQ is known to induce oxidative stress and dopaminergic neuronal death in both mammalian and *Drosophila* PD models<sup>6,31,51-53</sup>. Oxidative stress has been shown to contribute to the neuronal degeneration in PD pathogenesis, and flavonoids are known to rescue neuronal

degeneration<sup>32,54</sup>. However, most attention has been directed towards the antioxidant properties of flavonoids in conferring protection against diverse disease pathology, including NDs<sup>12,33</sup>. Both GA and GB belong to a group of specialized plant metabolites, polyphenols, which previously were considered to confer neuroprotection either by directly scavenging free radicals or by engaging the Nrf2-dependent antioxidant response pathways<sup>12,13</sup>. Previous studies indicate that micromolar concentrations of antioxidants are required to directly scavenge newly formed free radicals in cell culture models, a concentration range far exceeding the physiological levels<sup>34</sup>. Interestingly, our data show that the antioxidant properties of flavonoids are not sufficient to provide protection against environmental toxin-induced neurodegeneration in *Drosophila*. Our data indicate that both GA and GB display antioxidant properties by reducing PQ-mediated lipid peroxidation and inducing the levels of *cncC* transcripts in the fly heads. A recent study confirmed the antioxidant properties of GA through the suppression of reactive oxygen species in murine EL-4 cells<sup>55</sup>. However, since only GA and not GB elicits neuroprotection against PQ-induced toxicity, thereby confirming that the therapeutic potential is not solely dependent on the ability of GA to reduce PQ-induced oxidative stress. Our data also further confirm that the upregulation of the antioxidant response pathways, such as Nrf2 is insufficient in providing neuroprotection against PQ-induced neurodegeneration in *Drosophila*.

The emerging evidence suggests that the neuroprotective activity of natural compounds could be attributed to their direct interactions with evolutionary conserved adaptive stress response pathways, as postulated by the neurohormesis hypothesis<sup>12</sup>. This hypothesis implies that most plant-derived specialized metabolites evolved as deterrents and protection at hormetic doses by causing mild cellular damage that leads to the engagement of different stress response pathways<sup>12</sup>. The neurohormesis hypothesis fits well while explaining the neuroprotective potential of noxious



compounds at lower concentrations, but it fails to correctly predict the biological activity of polyphenols. Vast majority of polyphenols exhibit low toxicity, even at high concentrations and do not cause cellular damage at hormetic dosages, as suggested by the hypothesis<sup>13</sup>.

Sinclair and collaborators proposed that certain phytochemicals, mostly polyphenols may have evolved as chemical cues between autotrophs, herbivores, and omnivores, which became the basis of the xenohormesis hypothesis<sup>13,56</sup>. Stressed plants increase the synthesis of polyphenols which subsequently act as chemical signals allowing plant-feeding animals to sense environmental changes, such as shrinkage of food resources and prepare to face the adversity. Sirtuins are postulated to be majorly responsible for sensing these chemical cues and orchestrating the process of stress response in animals<sup>13</sup>. Polyphenols are synthesized by all plant species and it is not clear which classes of these specialized metabolites work as chemical cues. High doses of polyphenols are required to modulate the postulated cellular targets, often exceeding physiologically relevant concentrations. Additionally, certain polyphenols which provided cellular protection did not directly activate sirtuins<sup>57</sup>. Polyphenols, observed to be upregulated under stressful conditions, also failed to activate plant sirtuins<sup>58</sup>. Therefore, the beneficial effects of polyphenol intake may be associated with their interactions with other evolutionary conserved pathways and not necessarily sirtuins.

Our data indicate that GA confers neuroprotection through modulation of the neuroinflammatory pathways involving Relish, a homologue of mammalian NF- $\kappa$ B. We have previously shown that the NF- $\kappa$ B transcription factor, Relish contributes to environmental toxin-induced neurodegeneration in *Drosophila*<sup>6</sup>. NF- $\kappa$ B plays a critical role in regulating the inflammatory responses in both mammalian and *Drosophila* models<sup>59,60</sup>. Emerging evidence suggests that chronic neuroinflammation plays an essential role in the pathogenesis of diverse NDs, including

PD<sup>35,61</sup>. Post-mortem studies of brains of PD patients indicate elevated activation of NF- $\kappa$ B, thereby linking dysregulated inflammatory responses and PD pathogenesis<sup>62</sup>. Similarly, increased NF- $\kappa$ B activation has been associated with age-related neurodegeneration in *Drosophila*<sup>63</sup>. Given the critical association of neuroinflammation with the onset and progression of PD, it is desirable to identify potential drug leads that can target inflammatory pathways involved in the disease pathology. Consistent with our findings, selective inhibition of NF- $\kappa$ B has been shown to be a potential therapeutic target against neurodegeneration in both murine and *Drosophila* PD models<sup>64</sup>. Further studies are warranted to elucidate the precise mechanism underlying GA-mediated regulation of Relish against PQ-induced toxicity.

We also observed upregulation of NOS, the enzyme responsible for NO production, and subsequent elevation of NO levels in response to PQ-induced neurodegeneration in *Drosophila*<sup>40</sup>. NO is recognized as a molecular marker for neuroinflammation and has been shown to be associated with PD pathogenesis in both mammalian and *Drosophila* models<sup>37-39</sup>. Higher levels of inducible NOS (iNOS) were observed in the *substantia nigra* of PD patients and animal models<sup>36,37</sup>. Interestingly, GA pretreatment led to the downregulation of both NOS and NO levels induced by exposure to PQ, thereby providing protection against NO mediated inflammatory responses. Consistent with our data, another structurally related flavonoid from citrus fruit peels, tangeretin, has been shown to inhibit lipopolysaccharide (LPS)-induced production of NO to confer neuroprotection in several ND models<sup>65</sup>. Surprisingly, plant cells also experience oxidative burst and elevation of NO levels upon PQ exposure<sup>66,67</sup>. Increasing levels of reactive oxygen species and NO result in PQ-induced cell death<sup>68</sup>. Furthermore, NO has been previously shown to induce genes required for the synthesis of polyphenols that are known to confer protection against PQ<sup>69</sup>. However, it still remains unclear if the innate immune systems in plants and animals evolved

from a common ancestor or if the observed functional overlap stems from convergent evolution<sup>70</sup>. Little attention has been given to understanding the role of stress-induced polyphenols in the regulation of innate immunity systems and programmed cell death in plants and animals. We speculate that certain plant polyphenols may be involved in the regulation of molecular pathways leading to cell death during innate immune responses in plants and animals. Stafford previously argued that certain polyphenols may have evolved as internal physiological regulators or chemical messengers<sup>71</sup>. Further studies are needed to better understand the role of these polyphenols in the regulation of plant and animal innate immunity. It is of crucial importance to study these interactions in the context of a live organism at physiologically relevant concentrations.

Our data also demonstrate that GA pretreatment can reduce the levels of PQ-induced pro-apoptotic factors, including caspase-3 and *reaper*. Dysregulated caspase activation underlies several chronic disease conditions, including NDs<sup>42</sup>. *Drosophila* Reaper is known to bind to the inhibitor of apoptosis proteins (IAPs) to rescue caspases from proteasomal degradation and promote apoptosis<sup>72</sup>. Caspase activation appears to be involved in the progressive demise of the dopaminergic neurons resulting in PD pathogenesis. Previous studies have shown that flavonoids can function as specific activators or inhibitors of caspases<sup>44,45</sup>. Inhibitors against different caspases have been shown to rescue neuronal deaths in several experimental PD models<sup>41,73</sup>. Interestingly, caspase-3 dependent dopaminergic cell death has been observed in *Drosophila* models of PD<sup>43,74</sup>. Moreover, the involvement of caspase-8 has been reported in both human PD patients and mammalian mouse PD models<sup>75</sup>. Interestingly, our data show that GB can induce caspase-3 activities in *Drosophila* heads. In support of our findings, GB has been shown to induce caspase-dependent apoptosis in human leukemia cell lines<sup>76</sup>. Future studies will be directed

towards exploring the structural features of flavonoids that are critical for modulation of caspase activities in PD models.

Most studies involving natural products derived therapeutics translates to poor clinical outcome due to insufficient data regarding the bioavailability. This is the first report to reveal the presence of GA in the *Drosophila* heads in pharmacologically relevant nanomolar doses following food uptake containing 10  $\mu$ M GA. Although we did not test the bioavailability of GB in the *Drosophila* heads since it was not protective in our PD model, we speculate its presence in the fly heads due to its ability to induce the antioxidant and caspase-3 activities in response to PQ. We want to point out one of the limitations of the study in that we did not measure any other compounds that form as a result of the metabolism of GA in the fly gut, which might also influence the GA bioavailability in the brain. A recent study analyzed the *in vivo* metabolic profile of GA in rat plasma using high-performance liquid chromatography coupled with linear ion trap–Orbitrap mass spectrometer<sup>77</sup>. Further studies are required to detect the presence of other products resulting from *in vivo* metabolic biotransformation of flavonoids for improved therapeutic efficacy. Another problem in translational studies concerning the use of polyphenols is the fact they often are excluded from serious considerations as drug leads. This stems from their common classification as so called PAINS (pan-assay interference compounds) attributed to their nonspecific interactions with multiple protein targets<sup>78</sup>. The majority of these interactions have been reported based on screening large libraries of individual compounds using high-throughput cell-based assays, often at super-physiological concentrations, thereby underscoring the importance of testing these molecules in the context of a live organism at physiologically relevant concentrations. Additionally, it should not be excluded that certain polyphenols may have evolved to interact with multiple protein targets<sup>13,46</sup>.

Although, the exact etiology of sporadic PD pathogenesis remains elusive, it is thought to be multifactorial involving genetic and environmental triggers associated with disease onset. Earlier studies on drug discovery mainly focused on single target to avoid unnecessary side effects and toxicity<sup>79,80</sup>. Due to the multifaceted nature of NDs, it is necessary to pursue multiple target approach to achieve improved therapeutic outcomes. Our data identified GA as a potential multi-target neuroprotective agent against environmental toxin-induced PD symptoms in *Drosophila* through its diverse pharmacological effects, including antioxidant, anti-inflammatory, and anti-apoptotic properties (Fig. 8). Future studies are needed in genetic and mammalian PD models to validate the neuroprotective effects of GA for positive outcomes in clinical trials.

## Methods

### Drosophila culture and stocks

The fly stocks were raised on standard medium (Bloomington Stock Center recipe) containing cornmeal, corn syrup, yeast, and agar at 25 °C under a 12 h of light and 12 h of darkness cycle.

The wild-type strain *Canton S* was used as the control genotype for all experiments. Male flies aged three to five days old post-eclosion were used for all assays. The following stocks were purchased from the Bloomington Drosophila Stock Center at Indiana University: *CantonS*, *w<sup>1118</sup>*; *Rel<sup>E20</sup>*

### Chemicals

The following chemicals were purchased from Sigma-Aldrich: Sucrose, paraquat (methyl viologen dichloride hydrate), Gardenin A, Gardenin B, NOS inhibitor L-NAME. ProLong Gold Antifade Mountant with DAPI and TRIzol reagent were obtained from Thermo Fisher Scientific.

### Drosophila feeding regimen

Ten males of specified genotype, aged 3–5 days post-eclosion, were maintained in vials and fed daily on filter paper saturated with specified concentrations of paraquat or flavonoids (GardeninA or GardeninB) in 2.5% sucrose or with 2.5% sucrose only. Mortality was monitored daily until all flies were dead. Survival assays were performed with at least ten independent biological replicates of 10 males each for different feeding conditions.

### Mobility assay

Negative geotaxis assay was used to determine the mobility defects in adult male flies from each treatment group. Ten flies per feeding condition were placed in an empty plastic vial and gently

tapped to the bottom. The percentage of flies that crossed a line 5 cm from the bottom of the vial in 20 sec were recorded to compare between different feeding conditions. Ten independent biological replicates were assayed three times at 5 mins intervals and the percentages averaged. Statistical significance between different genotypes was calculated using one-way analysis of variance (ANOVA) for  $p < 0.05$ .

### **Immunofluorescence analysis**

Intact brains were dissected from adult male flies exposed to different feeding conditions as specified and processed for confocal imaging as described earlier<sup>6</sup>. Briefly, brains were dissected in 1x phosphate buffered saline with Tween20 (PBST), fixed in 4% paraformaldehyde for 20 min in a 24 well plate, and washed three times using 1x PBST. Brains were mounted on slides with coverslips using ProLong Gold Antifade Mountant with DAPI (Thermo Fisher Scientific). Whole mounts of dissected brains were imaged, and GFP-positive dopaminergic neurons were detected using a Nikon C2 DUVb confocal laser scanning microscope. The GFP-positive cells of specific DA clusters were counted based on confocal Z-stacks of whole mount brains.

### **Quantitative real time RT-PCR**

Total RNA was extracted from the heads of 25-30 adult male flies using TRIzol Reagent, and cDNA was prepared from 0.5–1 µg total RNA using the High Capacity cDNA Reverse Transcription kit (Applied Biosystems). The resulting cDNA samples were amplified using the iQ SYBR Green Supermix (Biorad) in a StepOnePlus Real time PCR System according to the manufacturer's protocols. The relative levels of specified transcripts were calculated using the  $\Delta\Delta C_t$  method, and the results were normalized based on the expression of *ribosomal protein L32* (*RpL32/RP49*) as the endogenous control within the same experimental setting. At least three

independent biological replicates were performed in response to specified feeding conditions for data analysis.

### **Nitric oxide assay**

The levels of nitric oxide were measured using a fluorometric assay kit according to the manufacturer's protocol (Cayman Chemical). Briefly, twenty fly heads were collected using liquid nitrogen from specified feeding conditions and homogenized in the assay buffer supplied with the kit. The resulting homogenates were centrifuged, and the supernatant were used for analysis using a 96-well white plate. The nitrite levels were determined with the addition of 2,3-diaminonaphthalene (DAN) and sodium hydroxide which results in the formation of a fluorescent product, 1(H)-naphthotriazole. The plates were then read in a fluorometer SpectroMax I3X (Molecular Devices) using an excitation wavelength of 360 nm and an emission wavelength of 430 nm.

### **Lipid peroxidation assay**

The levels of oxidative stress were determined using a fluorometric assay kit according to the manufacturer's protocol (Cayman Chemical). Briefly, twenty fly heads were collected using liquid nitrogen from specified feeding conditions and homogenized in ice-cold RIPA buffer followed by centrifugation at 1,600 x g for 10 min at 4°C. The resulting head homogenates were used to detect the levels of malondialdehyde, which is a naturally occurring product of lipid peroxidation, using a fluorometer SpectroMax I3X (Molecular Devices) at an excitation wavelength of 530 nm and an emission wavelength of 550 nm.



### **Caspase-3 activity assay**

The assay was performed according to the manufacturer's protocol using the EnzChek Caspase-3 assay kit (Thermo Fisher Scientific). Briefly, homogenates were prepared from ten fly heads per indicated feeding conditions using ice-cold cell lysis buffer supplied with the kit. The reaction was initiated using the Z-DEVD-AMC substrate and incubated at room temperature for 30 min. The inhibitor Ac-DEVD-CHO was added in specified wells to confirm the specificity of the assay. The plates were then read in a fluorometer SpectroMax I3X (Molecular Devices) using an excitation wavelength of 342 nm and an emission wavelength of 441 nm.

### **UPLC-QTOF-MS SIR analysis of *Drosophila* head extracts**

Adult male flies (250 per feeding conditions; three independent biological replicates) were fed either sucrose as a control or 10  $\mu$ M GardeninA for 4 days, followed by preparation of extracts from the fly heads using DMSO. Internal standard Nobiletin (1  $\mu$ M) was added during the homogenization step. The undiluted head homogenates in DMSO were directly used for analysis. UPLC-MS SIR analysis was performed using a Waters Xevo G2-XS QTOF mass spectrometer coupled with an ACQUITY I-Class UPLC system. An ACQUITY UPLC BEH C18 column (2.1 x 50 mm, 1.7  $\mu$ m) was utilized with an ACQUITY UPLC BEH C18 Van Guard Pre-column (2.1 x 50 mm, 1.7  $\mu$ m). The column was eluted using the following gradient solutions at a flow rate of 0.3 mL/min with mobile phase A (water with 0.1% formic acid) and B (acetonitrile with 0.1% formic acid): 0.0 min 80% A 20% B, 5.0 min 60% A 40%B, 10.0-15.0 min 0% A 100% B, 16.0-19 min 80% A 20% B. The injection volume for each sample was 5  $\mu$ L. SIR was performed in resolution positive ion mode on  $[M+H]^+$  ions of Nobiletin m/z 403.1393 during 0.0-6.0 min and GardeninA m/z 419.1342 during 6.0-19.0 min of the chromatogram. The ESI source conditions include:

Capillary voltage 0.35KV, Sampling cone 40 V, Source offset 80, Source temperature 100 °C, Desolvation 350 °C, Cone gas 0 L/h, Desolvation gas 400 L/h, lock spray capillary voltage 0.08 KV, lock mass: 556.2771 in positive ionization mode (leucine enkephalin, peak resolution 28,000). To quantify GardeninA concentrations in the fly head extracts, an internal calibration curve was constructed by plotting the integrated chromatogram peak area ratio (no peak smoothing) of GardeninA calibration standards (1, 10, 25, 50, and 100 nM) and internal standard Nobiletin (1 µM) versus their concentration ratio. To calculate % recovery, an external calibration curve of Nobiletin was constructed by plotting the integrated chromatogram peak areas (no peak smoothing) versus Nobiletin concentrations (50, 100, 250, 500, 1000 nM). The final concentrations of GardeninA in the head homogenates were calculated based on the total amounts per mg ± SD of fly heads for different feeding conditions.

### **Statistical analysis**

Data were analyzed using the GraphPad Prism 8 software (GraphPad Software, Inc., La Jolla, CA). Statistical significances of gene expression between different groups were determined using a non-parametric Mann Whitney U-test. For mobility and immunofluorescence assays, one-way analysis of variance (ANOVA) was used to compare differences between specified feeding groups. Results are expressed as mean ± SEM, and  $p < 0.05$  was considered statistically significant. Details of the specific analysis are indicated in the figure legends.

## **Acknowledgements**

This work was supported by start-up funds from the University of Alabama, American Society of Pharmacognosy Research Starter Grant and Alabama Life Research Institute grant to L.C.

## **Author contributions**

U.M. and L.C. designed research; U.M. and T.H. performed experimentations and U.M. analyzed data; Q.L. performed QTOF analysis; and U.M. and L.C. wrote the manuscript. All authors reviewed the manuscript.

## **Conflict of interest**

The authors declare no conflict of interest.

## Figure legends

### **Figure 1. The protective effects of the flavonoid, GardeninA and Levodopa against paraquat-**

**induced toxicity and mobility defects.** a. Schematic representation of the feeding regimen. Adult male flies were either pre-fed for 4 days with 2.5% sucrose or GardeninA (10  $\mu$ M) followed by continuous exposure to 5 mM PQ (Suc>Suc, Suc>PQ, GardeninA>PQ) and were scored daily for survival and mobility abilities. b. Survival assays were performed using adult male flies as outlined above and the number of live flies was recorded every 24 h until all of the flies died and the survival percentages were plotted at the indicated time points (Days 1,3, and 5). Data are representative of ten independent biological replicates with 10 flies per feeding conditions. Data shown represents mean  $\pm$  SEM. \*\* $p < 0.01$  based on the Mann-Whitney U test. c. The protective effect of GardeninA pre-treatment on the climbing abilities of flies exposed to PQ was determined by negative geotaxis assays. The number of flies able to cross 5 cm from the bottom of the vial within 20 s were recorded and plotted at the specified time points (24 and 48 h). Data are representative of at least five independent experiments with 10 flies per group. \*\*\* $p < 0.001$  based on one-way ANOVA between indicated feeding conditions. d. Survival assays were set up using male flies following exposure to either sucrose or 5 mM PQ or L-dopa or L-dopa+PQ and the number of live flies was recorded every 24 h and the survival percentages were plotted at the indicated time points (Days 3 and 5). Data are representative of ten independent biological replicates with 10 flies per feeding conditions. Data shown represent mean  $\pm$  SEM. \*\* $p < 0.01$  based on the Mann-Whitney U test. e. Negative geotaxis assays were used to determine the protective effect of L-dopa on the climbing abilities of flies exposed to PQ. The number of flies able to cross 5 cm within 20 s were recorded and plotted at the specified time points (24 and 48 h). Data are representative of at least five

independent experiments with 10 flies per group. \*\*\* $p < 0.001$  based on one-way ANOVA between indicated feeding conditions.

**Figure 2. The structurally related flavonoid, GardeninB fails to protect against paraquat-induced toxicity in survival and mobility assays.** a. Structure of GardeninB. b. Adult male flies were either pre-fed for 4 days with 2.5% sucrose or GardeninB (10  $\mu$ M) followed by continuous exposure to 5 mM PQ (Suc>Suc, Suc>PQ, GardeninB>PQ) and were scored daily for survival assays. The survival percentages were plotted at the indicated time points (Days 1,3, and 5). Data are representative of ten independent biological replicates with 10 male flies per feeding conditions. Data shown represent mean  $\pm$  SEM. \*\* $p < 0.01$  based on the Mann-Whitney U test. c. Negative geotaxis assays were used to determine the effect of GardeninB pre-treatment on the climbing abilities of flies exposed to PQ. The number of flies able to cross 5 cm within 20 s were recorded and plotted at the specified time points (24 and 48 h). Data are representative of at least five independent experiments with 10 male flies per group. \*\*\* $p < 0.001$  based on one-way ANOVA between indicated feeding conditions.

**Figure 3. GardeninA but not GardeninB is protective against PQ-mediated loss of dopaminergic neurons.** a. Confocal imaging was used to detect specific clusters of dopaminergic neurons in response to the indicated feeding conditions. Adult male flies were either pre-fed for 4 days with 2.5% sucrose or GardeninA or Gardenin B (10  $\mu$ M) followed by continuous exposure to 5 mM PQ for 48 h. The specific DA neuron clusters in the *Drosophila* brain are depicted by the GFP-positive green signals. White boxes indicate the DA neuron protocerebral posterior lateral 1 (PPL1) cluster and the white arrow specify the protocerebral posterior medial (PPM) DA neuron cluster. Scale bars 100  $\mu$ m. The bottom panel shows the enlarged representative views of the PPM DA clusters in response to the specified feeding conditions. b. The average number of

dopaminergic neurons per cluster (PPM and PPL1) in response to the indicated feeding conditions are plotted. Data are representative of at least three independent biological replicates. Data shown represent mean  $\pm$  SEM. \*\* $p < 0.01$ ; ns: not significant based on one-way ANOVA between different feeding conditions.

**Figure 4. The neuroprotective effect of GardeninA against PQ toxicity is not dependent on its antioxidant activities.** a. Effects of GA and GB on the levels of MDA as a marker for lipid peroxidation due to oxidative stress using a fluorometric assay. Adult male flies were either pre-fed for 4 days with 2.5% sucrose or GA or GB (10  $\mu$ M) followed by exposure to sucrose or 5 mM PQ for 18 h (Suc>Suc, Suc>PQ, GardeninA>PQ, GardeninB>PQ). The fly head homogenates were used to detect the levels of MDA ( $\mu$ M) based on the calibration curve generated using the standards provided with the fluorometric kit. All experiments were performed in triplicate and represent at least three independent biological repeats. Data shown represent mean  $\pm$  SEM. \*\*\* $p < 0.001$  based on one-way ANOVA between different feeding conditions. b. Effects of GA and GB on the transcript levels of *cncC*, the human Nrf2 orthologue in *Drosophila* using qRT-PCR. RNA was isolated from the heads of adult flies following exposure to the indicated feeding conditions. The transcript levels of *cncC* were analyzed and plotted after normalization with *rp49* levels as the internal control. Each data point represents mean  $\pm$  SEM. The mRNA fold changes are normalized to the sucrose-fed (Suc>Suc) flies (assigned a value of 1). \*\* $p < 0.01$  between different feeding conditions based on the Mann-Whitney U test.

**Figure 5. GardeninA confers protection against PQ-induced neurotoxicity through modulation of the neuroinflammatory responses in *Drosophila*.** a. Effects of GA and GB on the transcript levels of *relish*, the human NF $\kappa$ B orthologue in *Drosophila* using qRT-PCR. RNA was isolated from the heads of adult flies following exposure to the specified feeding conditions.

The transcript levels of *relish* were analyzed and plotted after normalization with *rp49* levels as the internal control. Each data point represents mean  $\pm$  SEM. The mRNA fold changes are normalized to the sucrose-fed (Suc>Suc) flies (assigned a value of 1).  $**p < 0.01$  between different feeding conditions based on Mann-Whitney U test. b. Survival assays were set up using adult *relish-null* mutant male flies following exposure to the indicated feeding conditions and the number of live flies was recorded every 24 h until all of the flies died, and the survival percentages were plotted. Data are representative of ten independent biological replicates with 10 male flies per feeding conditions. Data shown represents mean  $\pm$  SEM. c. Effects of GA and GB on the levels of nitric oxide using fluorometric assay. Adult male flies were either pre-fed for 4 days with 2.5% sucrose or GA or GB (10  $\mu$ M) followed by exposure to either sucrose or 5 mM PQ or PQ + L-NAME for 18 h (Suc>Suc, Suc>PQ, GardeninA>PQ, GardeninB>PQ). The fly head homogenates were used to detect the nitrite levels. All experiments were performed in triplicate and represent at least three independent biological repeats. Data shown are expressed as fluorescence arbitrary units (mean  $\pm$  SEM).  $*p < 0.05$ ;  $**p < 0.01$  based on one-way ANOVA between different feeding conditions. d. Effects of GA and GB on the transcript levels of nitric oxide synthase (*nos*), the enzyme involved in the synthesis of nitric oxide in *Drosophila* using qRT-PCR. RNA was isolated from the heads of adult flies following exposure to the specified feeding conditions. The transcript levels of *nos* were analyzed and plotted after normalization with *rp49* levels as the internal control. Each data point represents mean  $\pm$  SEM. The mRNA fold changes are normalized to the sucrose-fed (Suc>Suc) flies (assigned a value of 1).  $**p < 0.01$  between different feeding conditions based on Mann-Whitney U test.

**Figure 6. Effects of GardeninA and GardeninB on the caspase dependent apoptotic responses in *Drosophila*.** a. Caspase-3 activity was measured in response to GA and GB using

fluorometric assay. Adult male flies were either pre-fed for 4 days with 2.5% sucrose or GA or GB (10  $\mu$ M) followed by exposure to either sucrose or 5 mM PQ or PQ + caspase-3 inhibitor (Ac-DEVD-CHO) for 24 h (Suc>Suc, Suc>PQ, Suc>PQ+inhibitor, GardeninA>PQ, GardeninB>PQ). The fly head homogenates were used to detect the caspase-3 activities. Data are expressed as percentage in relation to the Suc>Suc control and represent averages from at least three independent biological repeats (mean  $\pm$  SEM). \*\* $p < 0.01$  based on one-way ANOVA between different feeding conditions. b. Effects of GA and GB on the transcript levels of *reaper*, the upstream pro-apoptotic gene in *Drosophila* using qRT-PCR. RNA was isolated from the heads of adult flies following exposure to the specified feeding conditions. The transcript levels of *reaper* were analyzed and plotted after normalization with *rp49* levels as the internal control. Each data point represents mean  $\pm$  SEM. The mRNA fold changes are normalized to the sucrose-fed (Suc>Suc) flies (assigned a value of 1). \*\* $p < 0.01$ ; ns: not significant between different feeding conditions based on Mann-Whitney U test.

**Figure 7. Detection of GardeninA in the *Drosophila* heads using UPLC/QTOF/MS SIR. a.**

Schematic representation of the feeding regimen. Adult male flies were either pre-fed for 4 days with 2.5% sucrose or GardeninA (10  $\mu$ M) followed by preparation of head homogenates using DMSO. Chromatograms of head homogenates from adult male flies pre-fed for 4 days with either (b) 2.5% sucrose or (c) 10  $\mu$ M GardeninA followed by extraction and analysis using UPLC/QTOF/MS in positive ionization mode.

**Figure 8. Schematic representation of GardeninA-mediated neuroprotection against PQ-**

**induced PD phenotypes in *Drosophila*.** PQ exposure induces oxidative stress and leads to the activation of genes involved in the neuroinflammatory pathways, including Relish and nitric oxide in adult male flies. Furthermore, it activates the pro-apoptotic responses leading to PD symptoms



involving increased mortality, mobility defects and progressive demise of dopaminergic neurons. The flavonoid, GardeninA confers protection against PQ-induced neurotoxicity by inhibiting the neuroinflammatory and the cellular death response pathways, thereby providing protection against PD like symptoms. Interestingly, the antioxidant activity of GardeninA alone is not sufficient to provide protection against PQ-induced neurotoxicity. GardeninA acts on multiple pathways that are commonly associated with PD pathogenesis to reduce the neurotoxic impact of PQ in adult flies. Therefore, Gardenin A can be a potential multifactorial therapeutic for the prevention of PD caused by environmental toxins.

\

## References

- 1 Heemels, M. T. Neurodegenerative diseases. *Nature* **539**, 179, doi:10.1038/539179a (2016).
- 2 Gooch, C. L., Pracht, E. & Borenstein, A. R. The burden of neurological disease in the United States: A summary report and call to action. *Ann Neurol* **81**, 479-484, doi:10.1002/ana.24897 (2017).
- 3 Mhyre, T. R., Boyd, J. T., Hamill, R. W. & Maguire-Zeiss, K. A. Parkinson's disease. *Subcell Biochem* **65**, 389-455, doi:10.1007/978-94-007-5416-4\_16 (2012).
- 4 Ratner, M. H., Farb, D. H., Ozer, J., Feldman, R. G. & Durso, R. Younger age at onset of sporadic Parkinson's disease among subjects occupationally exposed to metals and pesticides. *Interdiscip Toxicol* **7**, 123-133, doi:10.2478/intox-2014-0017 (2014).
- 5 Tanner, C. M. *et al.* Rotenone, paraquat, and Parkinson's disease. *Environ Health Perspect* **119**, 866-872, doi:10.1289/ehp.1002839 (2011).
- 6 Maitra, U., Scaglione, M. N., Chtarbanova, S. & O'Donnell, J. M. Innate immune responses to paraquat exposure in a Drosophila model of Parkinson's disease. *Sci Rep* **9**, 12714, doi:10.1038/s41598-019-48977-6 (2019).
- 7 Duty, S. & Jenner, P. Animal models of Parkinson's disease: a source of novel treatments and clues to the cause of the disease. *Br J Pharmacol* **164**, 1357-1391, doi:10.1111/j.1476-5381.2011.01426.x (2011).
- 8 Stykel, M. G. *et al.* Nitration of microtubules blocks axonal mitochondrial transport in a human pluripotent stem cell model of Parkinson's disease. *FASEB J* **32**, 5350-5364, doi:10.1096/fj.201700759RR (2018).
- 9 Schain, M. & Kreisl, W. C. Neuroinflammation in Neurodegenerative Disorders-a Review. *Curr Neurol Neurosci Rep* **17**, 25, doi:10.1007/s11910-017-0733-2 (2017).
- 10 Bondonno, N. P. *et al.* Flavonoid intake is associated with lower mortality in the Danish Diet Cancer and Health Cohort. *Nat Commun* **10**, 3651, doi:10.1038/s41467-019-11622-x (2019).
- 11 Shishtar, E., Rogers, G. T., Blumberg, J. B., Au, R. & Jacques, P. F. Long-term dietary flavonoid intake and risk of Alzheimer disease and related dementias in the Framingham Offspring Cohort. *Am J Clin Nutr*, doi:10.1093/ajcn/nqaa079 (2020).
- 12 Lee, J., Jo, D. G., Park, D., Chung, H. Y. & Mattson, M. P. Adaptive cellular stress pathways as therapeutic targets of dietary phytochemicals: focus on the nervous system. *Pharmacol Rev* **66**, 815-868, doi:10.1124/pr.113.007757 (2014).
- 13 Howitz, K. T. & Sinclair, D. A. Xenohormesis: sensing the chemical cues of other species. *Cell* **133**, 387-391, doi:10.1016/j.cell.2008.04.019 (2008).
- 14 *Antioxidants Market by Type (Natural (Vitamin A, Vitamin B, Vitamin C, and Rosemary Extract), Synthetic (Butylated Hydroxyanisole, Butylated Hydroxytoluene, and Others) - Global Opportunity Analysis and Industry Forecast, 2014-2022*, <<https://www.alliedmarketresearch.com/anti-oxidants-market>> (2016).
- 15 Baur, J. A. & Sinclair, D. A. What is Xenohormesis? *Am J Pharmacol Toxicol* **3**, 152-159, doi:10.3844/ajptsp.2008.152.159 (2008).
- 16 Newman, D. J. & Cragg, G. M. Natural Products as Sources of New Drugs over the Nearly Four Decades from 01/1981 to 09/2019. *J Nat Prod* **83**, 770-803, doi:10.1021/acs.jnatprod.9b01285 (2020).

- 17 Rabey, J. M. *et al.* Broad bean (*Vicia faba*) consumption and Parkinson's disease. *Adv Neurol* **60**, 681-684 (1993).
- 18 Cassani, E. *et al.* Mucuna pruriens for Parkinson's disease: Low-cost preparation method, laboratory measures and pharmacokinetics profile. *J Neurol Sci* **365**, 175-180, doi:10.1016/j.jns.2016.04.001 (2016).
- 19 Reichmann, H. *et al.* Ergoline and non-ergoline derivatives in the treatment of Parkinson's disease. *J Neurol* **253 Suppl 4**, IV36-38, doi:10.1007/s00415-006-4009-z (2006).
- 20 Yang, S. *et al.* Curcumin protects dopaminergic neuron against LPS induced neurotoxicity in primary rat neuron/glia culture. *Neurochem Res.* **33**, 2044-2053 (2008).
- 21 Ehninger, D., Neff, F. & Xie, K. Longevity, aging and rapamycin. *Cell Mol Life Sci* **71**, 4325-4346, doi:10.1007/s00018-014-1677-1 (2014).
- 22 Harrison, D. E. *et al.* Rapamycin fed late in life extends lifespan in genetically heterogeneous mice. *Nature* **460**, 392-395, doi:10.1038/nature08221 (2009).
- 23 Yousefzadeh, M. J. *et al.* Fisetin is a senotherapeutic that extends health and lifespan. *EBioMedicine* **36**, 18-28, doi:10.1016/j.ebiom.2018.09.015 (2018).
- 24 Xu, M. *et al.* Senolytics improve physical function and increase lifespan in old age. *Nat Med* **24**, 1246-1256, doi:10.1038/s41591-018-0092-9 (2018).
- 25 Zhang, P. *et al.* Senolytic therapy alleviates Abeta-associated oligodendrocyte progenitor cell senescence and cognitive deficits in an Alzheimer's disease model. *Nat Neurosci* **22**, 719-728, doi:10.1038/s41593-019-0372-9 (2019).
- 26 Patil, S. P., Jain, P. D., Ghumatkar, P. J., Tambe, R. & Sathaye, S. Neuroprotective effect of metformin in MPTP-induced Parkinson's disease in mice. *Neuroscience* **277**, 747-754, doi:10.1016/j.neuroscience.2014.07.046 (2014).
- 27 Wang, L. Y. *et al.* Catalpol Exerts a Neuroprotective Effect in the MPTP Mouse Model of Parkinson's Disease. *Front Aging Neurosci* **11**, 316, doi:10.3389/fnagi.2019.00316 (2019).
- 28 Geng, X., Tian, X., Tu, P. & Pu, X. Neuroprotective effects of echinacoside in the mouse MPTP model of Parkinson's disease. *Eur J Pharmacol* **564**, 66-74, doi:10.1016/j.ejphar.2007.01.084 (2007).
- 29 Chiu, S. P. *et al.* Neurotrophic action of 5-hydroxylated polymethoxyflavones: 5-demethylnobiletin and gardenin A stimulate neuritogenesis in PC12 cells. *J Agric Food Chem* **61**, 9453-9463, doi:10.1021/jf4024678 (2013).
- 30 Thilakarathna, S. H. & Rupasinghe, H. P. Flavonoid bioavailability and attempts for bioavailability enhancement. *Nutrients* **5**, 3367-3387, doi:10.3390/nu5093367 (2013).
- 31 Chaudhuri, A. *et al.* Interaction of genetic and environmental factors in a Drosophila parkinsonism model. *J Neurosci* **27**, 2457-2467, doi:10.1523/jneurosci.4239-06.2007 (2007).
- 32 Blesa, J., Trigo-Damas, I., Quiroga-Varela, A. & Jackson-Lewis, V. R. Oxidative stress and Parkinson's disease. *Front Neuroanat* **9**, 91, doi:10.3389/fnana.2015.00091 (2015).
- 33 Brunetti, C., Di Ferdinando, M., Fini, A., Pollastri, S. & Tattini, M. Flavonoids as antioxidants and developmental regulators: relative significance in plants and humans. *Int J Mol Sci* **14**, 3540-3555, doi:10.3390/ijms14023540 (2013).
- 34 Cuadrado, A. *et al.* Therapeutic targeting of the NRF2 and KEAP1 partnership in chronic diseases. *Nat Rev Drug Discov* **18**, 295-317, doi:10.1038/s41573-018-0008-x (2019).

- 35 Hirsch, E. C. & Hunot, S. Neuroinflammation in Parkinson's disease: a target for neuroprotection? *Lancet Neurol* **8**, 382-397, doi:10.1016/s1474-4422(09)70062-6 (2009).
- 36 Hancock, D. B., Martin, E. R., Vance, J. M. & Scott, W. K. Nitric oxide synthase genes and their interactions with environmental factors in Parkinson's disease. *Neurogenetics* **9**, 249-262, doi:10.1007/s10048-008-0137-1 (2008).
- 37 Xiong, Z. K. *et al.* Excessive levels of nitric oxide in rat model of Parkinson's disease induced by rotenone. *Exp Ther Med* **9**, 553-558, doi:10.3892/etm.2014.2099 (2015).
- 38 Inamdar, A. A., Chaudhuri, A. & O'Donnell, J. The Protective Effect of Minocycline in a Paraquat-Induced Parkinson's Disease Model in Drosophila is Modified in Altered Genetic Backgrounds. *Parkinsons Dis* **2012**, 938528, doi:10.1155/2012/938528 (2012).
- 39 Liberatore, G. T. *et al.* Inducible nitric oxide synthase stimulates dopaminergic neurodegeneration in the MPTP model of Parkinson disease. *Nat Med* **5**, 1403-1409, doi:10.1038/70978 (1999).
- 40 Ajjuri, R. R. & O'Donnell, J. M. Novel whole-tissue quantitative assay of nitric oxide levels in Drosophila neuroinflammatory response. *J Vis Exp*, 50892, doi:10.3791/50892 (2013).
- 41 Khan, S. *et al.* Implication of Caspase-3 as a Common Therapeutic Target for Multineurodegenerative Disorders and Its Inhibition Using Nonpeptidyl Natural Compounds. *Biomed Res Int* **2015**, 379817, doi:10.1155/2015/379817 (2015).
- 42 Troy, C. M. & Jean, Y. Y. Caspases: therapeutic targets in neurologic disease. *Neurotherapeutics* **12**, 42-48, doi:10.1007/s13311-014-0307-9 (2015).
- 43 Shukla, A. K. *et al.* Heat shock protein-70 (Hsp-70) suppresses paraquat-induced neurodegeneration by inhibiting JNK and caspase-3 activation in Drosophila model of Parkinson's disease. *PLoS One* **9**, e98886, doi:10.1371/journal.pone.0098886 (2014).
- 44 Das, A., Banik, N. L. & Ray, S. K. Flavonoids activated caspases for apoptosis in human glioblastoma T98G and U87MG cells but not in human normal astrocytes. *Cancer* **116**, 164-176, doi:10.1002/cncr.24699 (2010).
- 45 White, J. B. *et al.* Some natural flavonoids are competitive inhibitors of Caspase-1, -3 and -7 despite their cellular toxicity. *Food Chem* **131**, 1453-1459, doi:10.1016/j.foodchem.2011.10.026 (2012).
- 46 Maitra, U. & Ciesla, L. Using Drosophila as a platform for drug discovery from natural products in Parkinson's disease. *Medchemcomm* **10**, 867-879, doi:10.1039/c9md00099b (2019).
- 47 Maher, P. The Potential of Flavonoids for the Treatment of Neurodegenerative Diseases. *Int J Mol Sci* **20**, doi:10.3390/ijms20123056 (2019).
- 48 Tran, J., Anastacio, H. & Bardy, C. Genetic predispositions of Parkinson's disease revealed in patient-derived brain cells. *NPJ Parkinsons Dis* **6**, 8, doi:10.1038/s41531-020-0110-8 (2020).
- 49 Alonso-Castro, A. J. *et al.* Evaluation of the neuropharmacological effects of Gardenin A in mice. *Drug Dev Res*, doi:10.1002/ddr.21659 (2020).
- 50 During, A. & Larondelle, Y. The O-methylation of chrysin markedly improves its intestinal anti-inflammatory properties: Structure-activity relationships of flavones. *Biochem Pharmacol* **86**, 1739-1746, doi:10.1016/j.bcp.2013.10.003 (2013).
- 51 Cassar, M. *et al.* A dopamine receptor contributes to paraquat-induced neurotoxicity in Drosophila. *Hum Mol Genet* **24**, 197-212, doi:10.1093/hmg/ddu430 (2015).

- 52 Cicchetti, F. *et al.* Systemic exposure to paraquat and maneb models early Parkinson's disease in young adult rats. *Neurobiol Dis* **20**, 360-371, doi:10.1016/j.nbd.2005.03.018 (2005).
- 53 Purisai, M. G. *et al.* Microglial activation as a priming event leading to paraquat-induced dopaminergic cell degeneration. *Neurobiol Dis* **25**, 392-400, doi:10.1016/j.nbd.2006.10.008 (2007).
- 54 Grosso, C., Valentao, P., Ferreres, F. & Andrade, P. B. The use of flavonoids in central nervous system disorders. *Curr Med Chem* **20**, 4694-4719, doi:10.2174/09298673113209990155 (2013).
- 55 Yang, W. L., Chen, S. Y., Ho, C. Y. & Yen, G. C. Citrus flavonoids suppress IL-5 and ROS through distinct pathways in PMA/ionomycin-induced EL-4 cells. *Food Funct* **11**, 824-833, doi:10.1039/c9fo02815c (2020).
- 56 Lamming, D. W., Wood, J. G. & Sinclair, D. A. Small molecules that regulate lifespan: evidence for xenohormesis. *Mol Microbiol* **53**, 1003-1009, doi:10.1111/j.1365-2958.2004.04209.x (2004).
- 57 Beher, D. *et al.* Resveratrol is not a direct activator of SIRT1 enzyme activity. *Chem Biol Drug Des* **74**, 619-624, doi:10.1111/j.1747-0285.2009.00901.x (2009).
- 58 Soccio, M., Laus, M. N., Alfarano, M. & Pastore, D. Measuring Activity of Native Plant Sirtuins - The Wheat Mitochondrial Model. *Front Plant Sci* **9**, 961, doi:10.3389/fpls.2018.00961 (2018).
- 59 Lemaitre, B. & Hoffmann, J. The host defense of *Drosophila melanogaster*. *Annu Rev Immunol* **25**, 697-743, doi:10.1146/annurev.immunol.25.022106.141615 (2007).
- 60 Silverman, N. & Maniatis, T. NF-kappaB signaling pathways in mammalian and insect innate immunity. *Genes Dev* **15**, 2321-2342, doi:10.1101/gad.909001 (2001).
- 61 Tansey, M. G. & Goldberg, M. S. Neuroinflammation in Parkinson's disease: its role in neuronal death and implications for therapeutic intervention. *Neurobiol Dis* **37**, 510-518, doi:10.1016/j.nbd.2009.11.004 (2010).
- 62 Hunot, S. *et al.* Nuclear translocation of NF-kappaB is increased in dopaminergic neurons of patients with parkinson disease. *Proc Natl Acad Sci U S A* **94**, 7531-7536, doi:10.1073/pnas.94.14.7531 (1997).
- 63 Kounatidis, I. *et al.* NF-kappaB Immunity in the Brain Determines Fly Lifespan in Healthy Aging and Age-Related Neurodegeneration. *Cell Rep* **19**, 836-848, doi:10.1016/j.celrep.2017.04.007 (2017).
- 64 Flood, P. M. *et al.* Transcriptional Factor NF-kB as a Target for Therapy in Parkinson's Disease. *Parkinsons Dis* **2011**, 216298, doi:10.4061/2011/216298 (2011).
- 65 Lee, Y. Y. *et al.* Anti-Inflammatory and Antioxidant Mechanism of Tangeretin in Activated Microglia. *J Neuroimmune Pharmacol* **11**, 294-305, doi:10.1007/s11481-016-9657-x (2016).
- 66 Somboon, T. *et al.* Methyl jasmonate and cyclodextrin-mediated defense mechanism and protective effect in response to paraquat-induced stress in peanut hairy root. *Phytochemistry* **163**, 11-22, doi:10.1016/j.phytochem.2019.03.017 (2019).
- 67 Hasanuzzaman, M. *et al.* Exogenous nitric oxide pretreatment protects *Brassica napus* L. seedlings from paraquat toxicity through the modulation of antioxidant defense and glyoxalase systems. *Plant Physiol Biochem* **126**, 173-186, doi:10.1016/j.plaphy.2018.02.021 (2018).

- 68 Muhammad Kamran Qureshi, N. S., Tsanko S. Gechev & Jacques Hille The zinc finger protein ZAT11 modulates paraquat-induced programmed cell death in *Arabidopsis thaliana*. *Acta Physiol Plant* **35**, 1863-1871, doi:10.1007/s11738-013-1224-y (2013).
- 69 Delledonne, M., Xia, Y., Dixon, R. A. & Lamb, C. Nitric oxide functions as a signal in plant disease resistance. *Nature* **394**, 585-588, doi:10.1038/29087 (1998).
- 70 Nurnberger, T., Brunner, F., Kemmerling, B. & Piater, L. Innate immunity in plants and animals: striking similarities and obvious differences. *Immunol Rev* **198**, 249-266, doi:10.1111/j.0105-2896.2004.0119.x (2004).
- 71 Stafford, H. A. Flavonoid evolution: an enzymic approach. *Plant Physiol* **96**, 680-685, doi:10.1104/pp.96.3.680 (1991).
- 72 Goyal, L., McCall, K., Agapite, J., Hartwig, E. & Steller, H. Induction of apoptosis by *Drosophila* reaper, hid and grim through inhibition of IAP function. *Embo j* **19**, 589-597, doi:10.1093/emboj/19.4.589 (2000).
- 73 Qiao, C. *et al.* Caspase-1 Deficiency Alleviates Dopaminergic Neuronal Death via Inhibiting Caspase-7/AIF Pathway in MPTP/p Mouse Model of Parkinson's Disease. *Mol Neurobiol* **54**, 4292-4302, doi:10.1007/s12035-016-9980-5 (2017).
- 74 Shukla, A. K. *et al.* Mutation in *Drosophila* methuselah resists paraquat induced Parkinson-like phenotypes. *Neurobiol Aging* **35**, 2419.e2411-2419.e2416, doi:10.1016/j.neurobiolaging.2014.04.008 (2014).
- 75 Hartmann, A. *et al.* Caspase-8 is an effector in apoptotic death of dopaminergic neurons in Parkinson's disease, but pathway inhibition results in neuronal necrosis. *J Neurosci* **21**, 2247-2255 (2001).
- 76 Cabrera, J. *et al.* Gardenin B-induced cell death in human leukemia cells involves multiple caspases but is independent of the generation of reactive oxygen species. *Chem Biol Interact* **256**, 220-227, doi:10.1016/j.cbi.2016.07.016 (2016).
- 77 Zhang, J. *et al.* Identification of metabolites of gardenin A in rats by combination of high-performance liquid chromatography with linear ion trap-Orbitrap mass spectrometer based on multiple data processing techniques. *Biomed Chromatogr* **29**, 379-387, doi:10.1002/bmc.3287 (2015).
- 78 Baell, J. & Walters, M. A. Chemistry: Chemical con artists foil drug discovery. *Nature* **513**, 481-483, doi:10.1038/513481a (2014).
- 79 Frantz, S. Drug discovery: playing dirty. *Nature* **437**, 942-943, doi:10.1038/437942a (2005).
- 80 Yang, K., Bai, H., Ouyang, Q., Lai, L. & Tang, C. Finding multiple target optimal intervention in disease-related molecular network. *Mol Syst Biol* **4**, 228, doi:10.1038/msb.2008.60 (2008).

## Figures

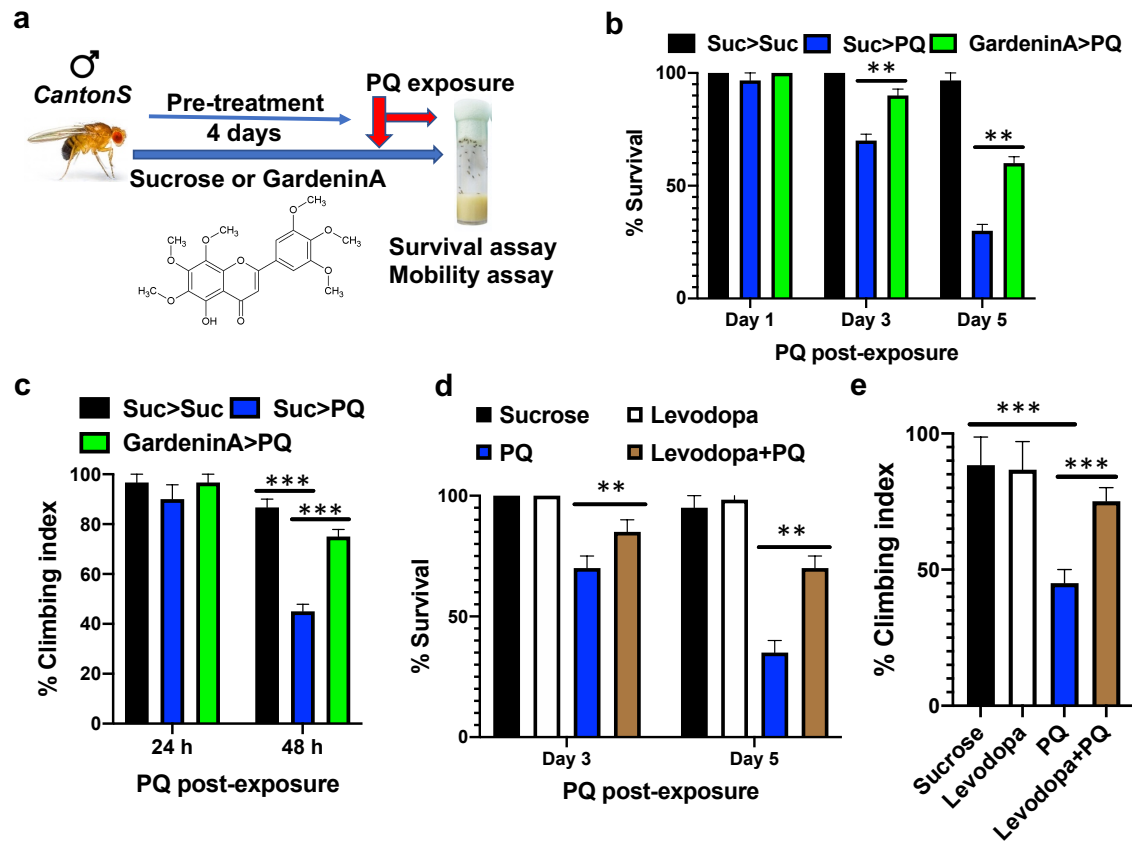

Fig. 1

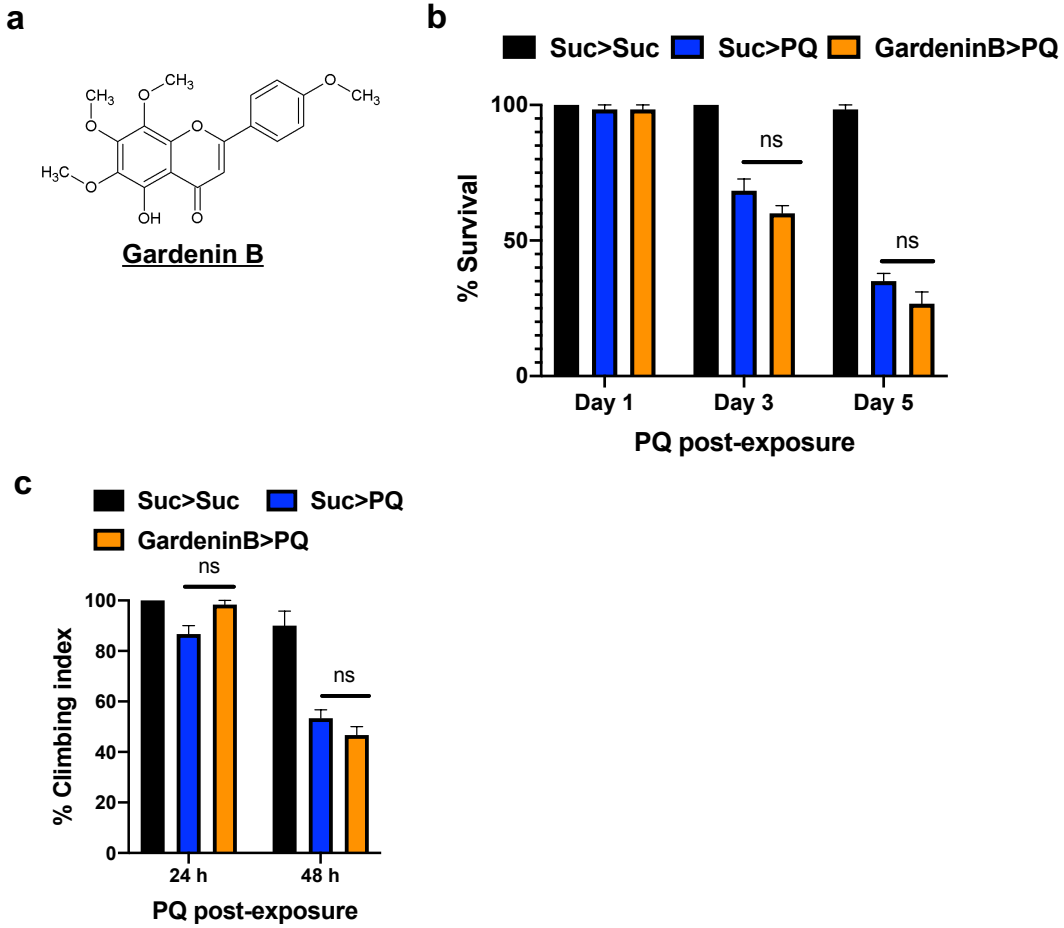

**Fig. 2**



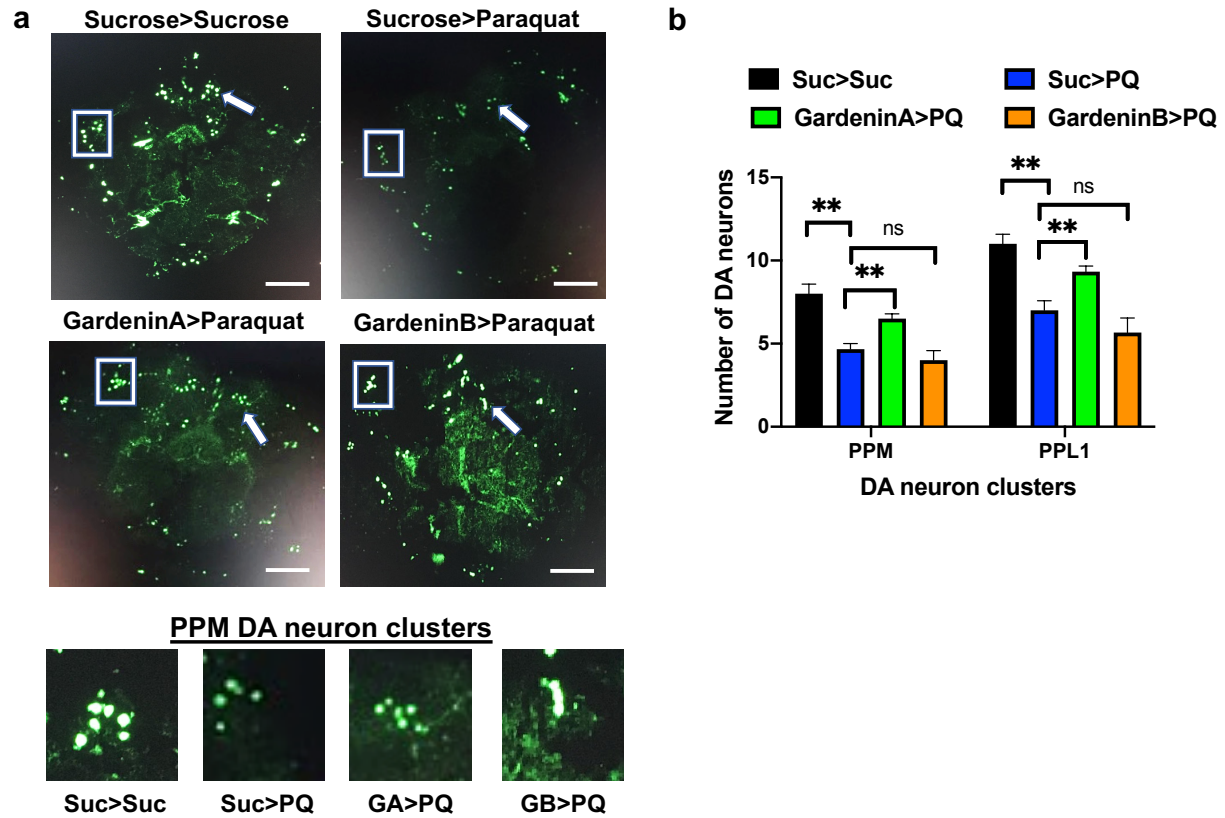

**Fig. 3**

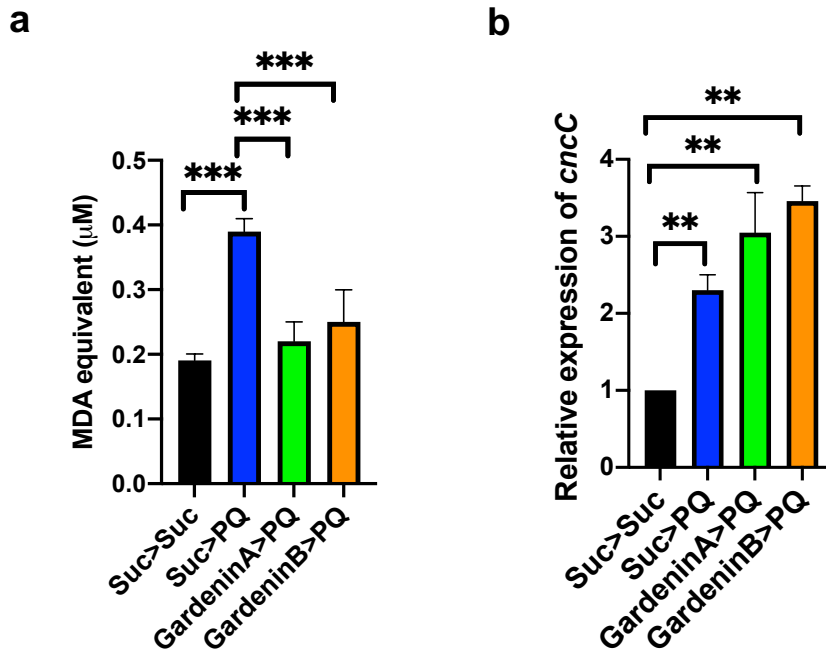

**Fig. 4**

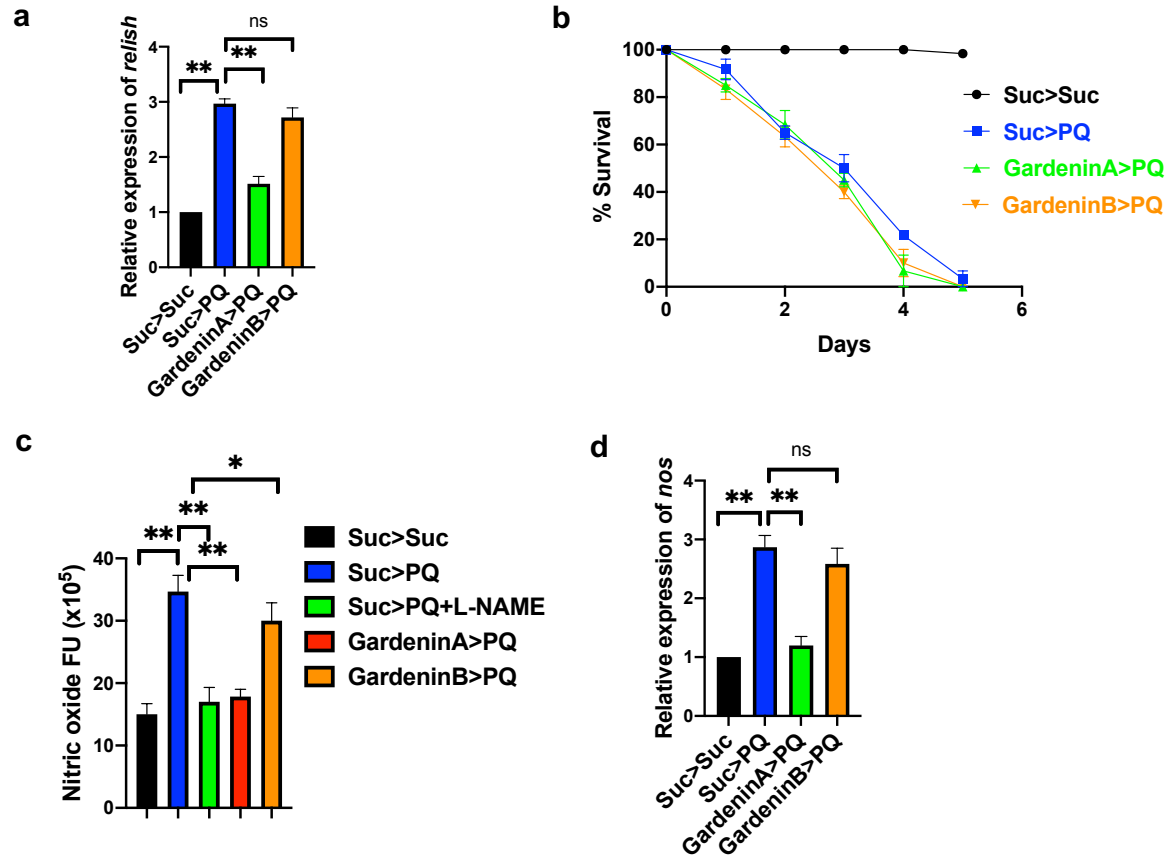

**Fig. 5**

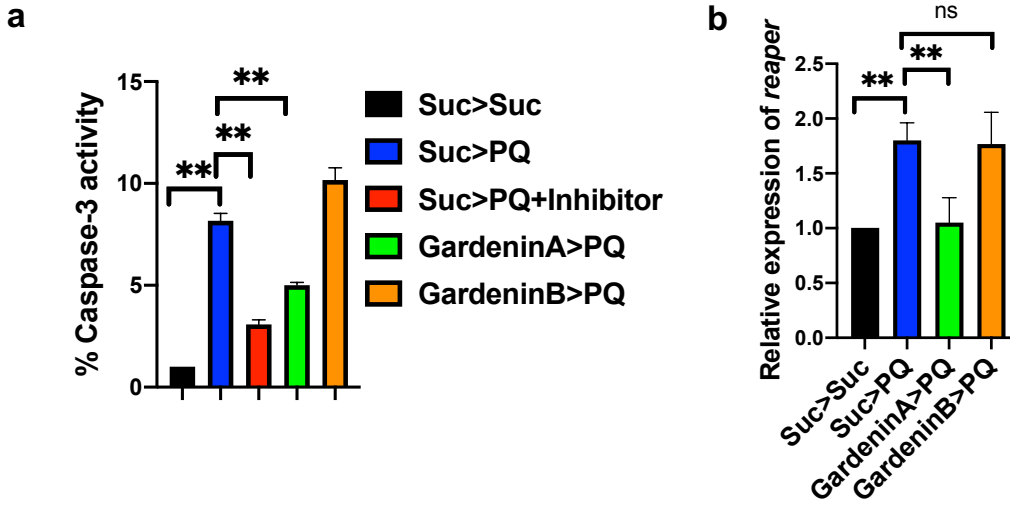

**Fig. 6**

**a**

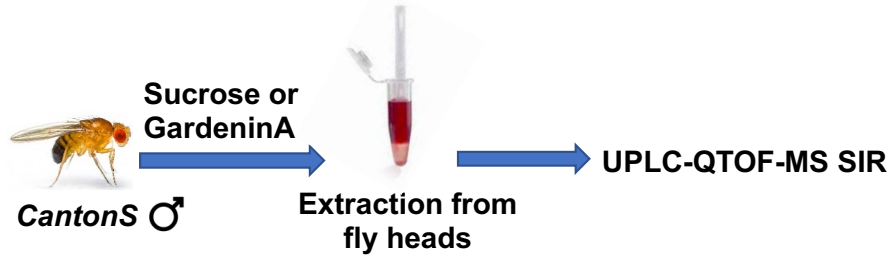

**b GardeninA-fed head extracts**

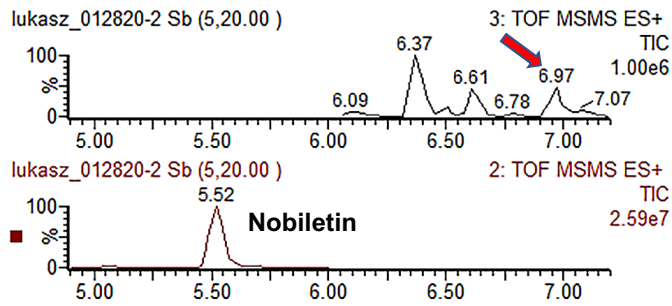

**c Sucrose-fed head extracts**

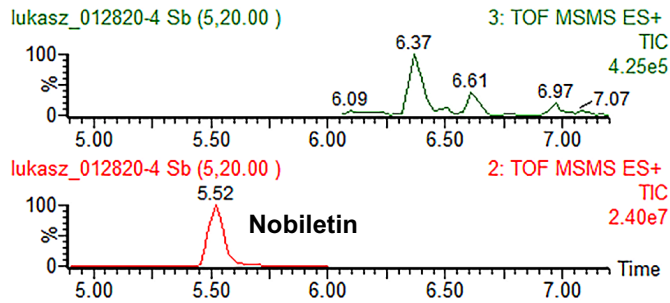

**Fig. 7**

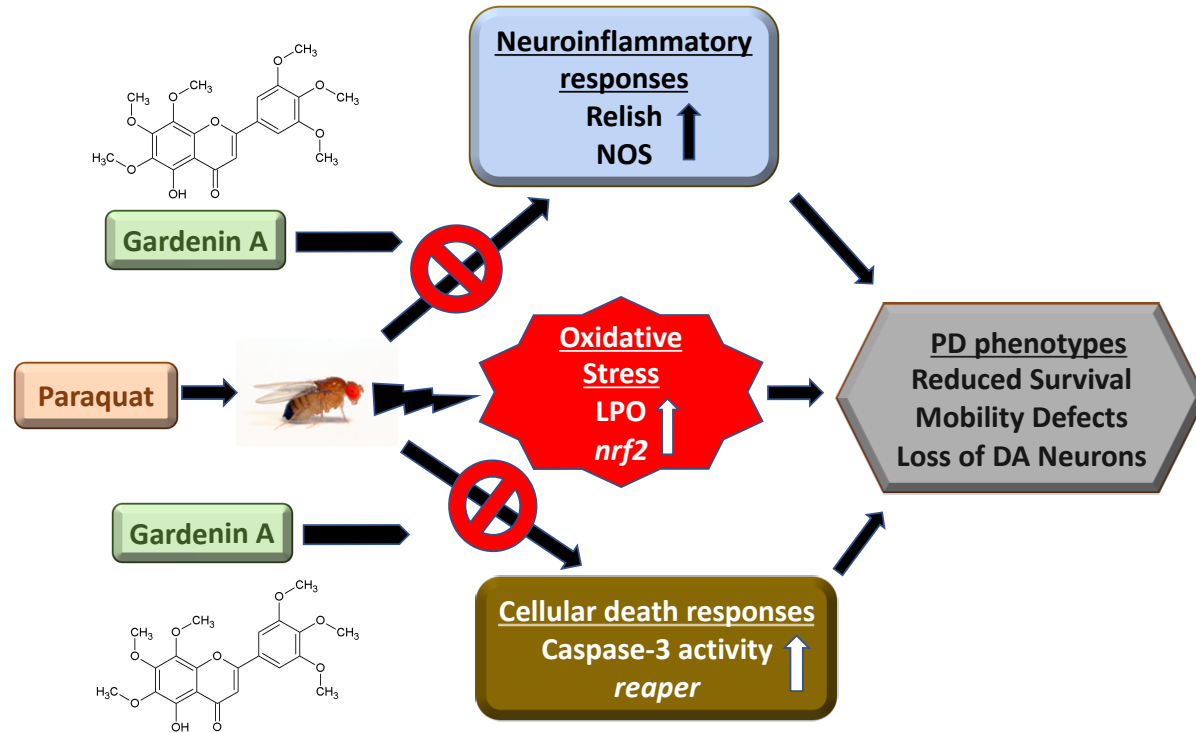

Fig. 8
